# Supplementary material
Source: HighWire-hosted journal article supplement (https://bmjopen.bmj.com/content/10/11/e039910)
Supplement: inline-supplementary-material-1 [file inline-supplementary-material-1.pdf]

## Supplementary Tables

Table A1. Data sources

Table A2. ICD10 codes defining ACSCs

Table A3. Number and annual growth rate of ACSC emergency admissions 2004-2017

Table A4. Average spatial correlation of ISARs 2004-2017.

Table A5. Clustering of ISARs 2004-2017

Table A6. Transition probabilities between clusters 2004 to 2017.

### Table A1. Data sources

| Data                                                             | Data source                                                                                                                                                         |
|------------------------------------------------------------------|---------------------------------------------------------------------------------------------------------------------------------------------------------------------|
| Number of patients by age and gender                             | NHS Digital<br><a href="http://content.digital.nhs.uk/workforce">http://content.digital.nhs.uk/workforce</a>                                                        |
| 2015 Index of Multiple Deprivation from Neighbourhood Statistics | Office for National Statistics<br><a href="http://www.neighbourhood.statistics.gov.uk/dissemination/">http://www.neighbourhood.statistics.gov.uk/dissemination/</a> |
| Attribution Data Set                                             | NHS Digital<br><a href="http://content.digital.nhs.uk/">http://content.digital.nhs.uk/</a>                                                                          |
| 2017 CCG boundaries                                              | <a href="https://data.gov.uk/">https://data.gov.uk/</a>                                                                                                             |

**Table A2. ICD10 codes for ACSCs and for incentivised ACSCs.**

| Disease group                         | ICD10 code | ICD 10 Name                                                          | NHS Outcomes Framework 2014/2015 | Harrison et al 2013 |
|---------------------------------------|------------|----------------------------------------------------------------------|----------------------------------|---------------------|
| Angina                                | I20        | Angina pectoris                                                      | Chronic                          | Incentivized        |
| Angina                                | I24.0      | Coronary thrombosis not resulting in myocardial infarction           | Acute                            | Incentivized        |
| Angina                                | I24.8      | Other forms of acute ischaemic heart disease                         | Acute                            | Incentivized        |
| Angina                                | I24.9      | Acute ischaemic heart disease, unspecified                           | Acute                            | Incentivized        |
| Asthma                                | J45        | Asthma                                                               | Chronic                          | Incentivized        |
| Asthma                                | J46        | Status asthmaticus                                                   | Chronic                          | Incentivized        |
| Cardiovascular diseases               | I13.0      | Hypertensive heart and renal disease with (congestive) heart failure | Chronic                          | Incentivized        |
| Cardiovascular diseases               | I25        | Chronic ischaemic heart disease                                      | Chronic                          | Incentivized        |
| Cardiovascular diseases               | I48X       | Atrial fibrillation and flutter                                      | Chronic                          |                     |
| Cellulitis                            | L01        | Impetigo                                                             | Acute                            |                     |
| Cellulitis                            | L02        | Cutaneous abscess, furuncle and carbuncle                            | Acute                            |                     |
| Cellulitis                            | L03        | Cellulitis                                                           | Acute                            | Non-incentivized    |
| Cellulitis                            | L04        | Acute lymphadenitis                                                  | Acute                            | Non-incentivized    |
| Cellulitis                            | L08.0      | Pyoderma                                                             | Acute                            | Non-incentivized    |
| Cellulitis                            | L08.8      | Other specified local infections of skin and subcutaneous tissue     | Acute                            | Non-incentivized    |
| Cellulitis                            | L08.9      | Local infection of skin and subcutaneous tissue, unspecified         | Acute                            | Non-incentivized    |
| Cellulitis                            | L88        | Pyoderma gangrenosum                                                 | Acute                            | Non-incentivized    |
| Cellulitis                            | L98.0      | Pyogenic granuloma                                                   | Acute                            | Non-incentivized    |
| Cellulitis                            | I89.1      | Lymphangitis                                                         | Acute                            |                     |
| Chronic obstructive pulmonary disease | J20        | Acute bronchitis                                                     | Chronic                          | Incentivized        |
| Chronic obstructive pulmonary disease | J41        | Simple and mucopurulent chronic bronchitis                           | Chronic                          | Incentivized        |
| Chronic obstructive pulmonary disease | J42        | Unspecified chronic bronchitis                                       | Chronic                          | Incentivized        |
| Chronic obstructive pulmonary disease | J43        | Emphysema                                                            | Chronic                          | Incentivized        |
| Chronic obstructive pulmonary disease | J44        | Other chronic obstructive pulmonary disease                          | Chronic                          | Incentivized        |
| Chronic obstructive pulmonary disease | J47        | Bronchiectasis                                                       | Chronic                          | Incentivized        |
| Congestive heart failure              | I11.0      | Hypertensive heart disease with (congestive) heart failure           | Chronic                          | Incentivized        |
| Congestive heart failure              | I50        | Heart failure                                                        |                                  | Incentivized        |
| Congestive heart failure              | J81        | Pulmonary oedema                                                     | Chronic                          | Incentivized        |
| Convulsions and epilepsy              | G40        | Epilepsy                                                             | Chronic                          | Incentivized        |
| Convulsions and epilepsy              | G41        | Status epilepticus                                                   | Chronic                          | Incentivized        |
| Dehydration and gastroenteritis       | E86        | Volume depletion                                                     | Acute                            | Non-incentivized    |
| Dehydration and gastroenteritis       | K52.2      | Allergic and dietetic gastro-enteritis and colitis                   |                                  | Non-incentivized    |

| Disease group                    | ICD10 code  | ICD 10 Name                                                          | NHS Outcomes Framework 2014/2015 | Harrison et al 2013 |
|----------------------------------|-------------|----------------------------------------------------------------------|----------------------------------|---------------------|
| Dehydration and gastroenteritis  | K52.8       | Other specified non-infective gastro-enteritis and colitis           |                                  | Non-incentivized    |
| Dehydration and gastroenteritis  | K52.9       | Non-infective gastro-enteritis and colitis, unspecified              |                                  | Non-incentivized    |
| Diabetes (hypoglycaemic)         | E16.2       | Hypoglycaemia, unspecified                                           |                                  | Incentivized        |
| Diabetes complications           | E10.0–E10.8 | Insulin-dependent diabetes mellitus                                  | Chronic                          | Incentivized        |
| Diseases of the blood            | D51         | Vitamin B12 deficiency anaemia                                       | Chronic                          |                     |
| Diseases of the blood            | D52         | Folate deficiency anaemia                                            | Chronic                          |                     |
| Ear, nose and throat infections  | H66         | Suppurative and unspecified otitis media                             | Acute                            | Non-incentivized    |
| Ear, nose and throat infections  | H67         | Otitis media in diseases classified elsewhere                        | Acute                            | Non-incentivized    |
| Ear, nose and throat infections  | J02         | Acute pharyngitis                                                    | Acute                            | Non-incentivized    |
| Ear, nose and throat infections  | J03         | Acute tonsillitis                                                    | Acute                            | Non-incentivized    |
| Ear, nose and throat infections  | J04         | Acute laryngitis and tracheitis                                      | Acute                            | Non-incentivized    |
| Ear, nose and throat infections  | J06         | Acute upper respiratory infections of multiple and unspecified sites | Acute                            | Non-incentivized    |
| Ear, nose and throat infections  | J31.2       | Chronic pharyngitis                                                  | Acute                            | Non-incentivized    |
| Gangrene                         | R02         | Gangrene, not elsewhere classified                                   |                                  | Non-incentivized    |
| Hypertension                     | I10         | Essential (primary) hypertension                                     | Chronic                          | Incentivized        |
| Hypertension                     | I11.9       | Hypertensive heart disease without (congestive) heart failure        | Chronic                          | Incentivized        |
| Influenza and pneumonia          | J10         | Influenza due to identified influenza virus                          | Acute                            |                     |
| Influenza and pneumonia          | J11         | Influenza, virus not identified                                      | Acute                            |                     |
| Influenza and pneumonia          | J13X        | Pneumonia due to Streptococcus pneumoniae                            | Acute                            |                     |
| Influenza and pneumonia          | J14         | Pneumonia due to Haemophilus influenzae                              | Acute                            |                     |
| Influenza and pneumonia          | J15.3       | Pneumonia due to streptococcus, group B                              | Acute                            |                     |
| Influenza and pneumonia          | J15.4       | Pneumonia due to other streptococci                                  | Acute                            |                     |
| Influenza and pneumonia          | J15.7       | Pneumonia due to Mycoplasma pneumoniae                               | Acute                            |                     |
| Influenza and pneumonia          | J15.9       | Bacterial pneumonia, unspecified                                     | Acute                            |                     |
| Influenza and pneumonia          | J16.8       | Pneumonia due to other specified infectious organisms                | Acute                            |                     |
| Influenza and pneumonia          | J18.1       | Lobar pneumonia, unspecified                                         | Acute                            |                     |
| Influenza and pneumonia          | J18.8       | Other pneumonia, organism unspecified                                | Acute                            |                     |
| Iron deficiency anaemia          | D50.1       | Sideropenic dysphagia                                                | Chronic                          | Non-incentivized    |
| Iron deficiency anaemia          | D50.8       | Other iron deficiency anaemias                                       | Chronic                          | Non-incentivized    |
| Iron deficiency anaemia          | D50.9       | Iron deficiency anaemia, unspecified                                 | Chronic                          | Non-incentivized    |
| Mental and behavioural disorders | F00         | Dementia in Alzheimer's disease                                      | Chronic                          |                     |
| Mental and behavioural disorders | F01         | Vascular dementia                                                    | Chronic                          |                     |
| Mental and behavioural disorders | F02         | Dementia in other diseases classified elsewhere                      | Chronic                          |                     |
| Mental and behavioural disorders | F03         | Unspecified dementia                                                 | Chronic                          |                     |

| Disease group                        | ICD10 code  | ICD 10 Name                                                                                         | NHS Outcomes Framework 2014/2015 | Harrison et al 2013 |
|--------------------------------------|-------------|-----------------------------------------------------------------------------------------------------|----------------------------------|---------------------|
| Mental and behavioural disorders     | G30.0       | Alzheimer's disease with early onset                                                                | Chronic                          |                     |
| Mental and behavioural disorders     | G30.1       | Alzheimer's disease with late onset                                                                 | Chronic                          |                     |
| Mental and behavioural disorders     | G30.8       | Other Alzheimer's disease                                                                           | Chronic                          |                     |
| Mental and behavioural disorders     | G30.9       | Alzheimer's disease, unspecified                                                                    | Chronic                          |                     |
| Mental and behavioural disorders     | G31.0       | Circumscribed brain atrophy                                                                         | Chronic                          |                     |
| Mental and behavioural disorders     | G31.1       | Senile degeneration of brain, not elsewhere classified                                              | Chronic                          |                     |
| Mental and behavioural disorders     | G31.8       | Other specified degenerative diseases of nervous system                                             | Chronic                          |                     |
| Mental and behavioural disorders     | F05.1       | Delirium superimposed on dementia                                                                   | Acute                            |                     |
| Mental and behavioural disorders     | F10.7       | Mental and behavioural disorders due to use of alcohol - Residual and late-onset psychotic disorder | Chronic                          |                     |
| Nutritional deficiencies             | E40         | Kwashiorkor                                                                                         |                                  | Non-incentivized    |
| Nutritional deficiencies             | E41         | Nutritional marasmus                                                                                |                                  | Non-incentivized    |
| Nutritional deficiencies             | E42         | Marasmic kwashiorkor                                                                                |                                  | Non-incentivized    |
| Nutritional deficiencies             | E43         | Unspecified severe protein-energy malnutrition                                                      |                                  | Non-incentivized    |
| Nutritional deficiencies             | E55.0       | Rickets, active                                                                                     |                                  | Non-incentivized    |
| Nutritional deficiencies             | E64.3       | Sequelae of rickets                                                                                 |                                  | Non-incentivized    |
| Nutritional, endocrine and metabolic | E11.0–E11.8 | Non-insulin-dependent diabetes mellitus                                                             | Chronic                          | Incentivized        |
| Nutritional, endocrine and metabolic | E12         | Malnutrition-related diabetes mellitus                                                              | Chronic                          |                     |
| Nutritional, endocrine and metabolic | E13.0–E13.8 | Other specified diabetes mellitus                                                                   | Chronic                          | Incentivized        |
| Nutritional, endocrine and metabolic | E14.0–E14.8 | Unspecified diabetes mellitus                                                                       | Chronic                          | Incentivized        |
| Other vaccine preventable            | A35         | Other tetanus                                                                                       |                                  | Non-incentivized    |
| Other vaccine preventable            | A36         | Diphtheria                                                                                          | Acute                            | Non-incentivized    |
| Other vaccine preventable            | A37         | Whooping cough                                                                                      | Acute                            | Non-incentivized    |
| Other vaccine preventable            | A80         | Acute poliomyelitis                                                                                 |                                  | Non-incentivized    |
| Other vaccine preventable            | B05         | Measles                                                                                             | Acute                            | Non-incentivized    |
| Other vaccine preventable            | B06         | Rubella [German measles]                                                                            | Acute                            | Non-incentivized    |
| Other vaccine preventable            | B16.1       | Acute hepatitis B with delta-agent (coinfection) without hepatic coma                               | Acute                            | Non-incentivized    |
| Other vaccine preventable            | B16.9       | Acute hepatitis B without delta-agent and without hepatic coma                                      | Acute                            | Non-incentivized    |
| Other vaccine preventable            | B18.0       | Chronic viral hepatitis B with delta-agent                                                          | Chronic                          | Non-incentivized    |
| Other vaccine preventable            | B18.1       | Chronic viral hepatitis B without delta-agent                                                       | Chronic                          | Non-incentivized    |
| Other vaccine preventable            | B26         | Mumps                                                                                               |                                  | Non-incentivized    |
| Other vaccine preventable            | G00.0       | Haemophilus meningitis                                                                              |                                  | Non-incentivized    |
| Other vaccine preventable            | M01.4       | Rubella arthritis                                                                                   | Acute                            | Non-incentivized    |
| Pelvic inflammatory disease          | N70         | Salpingitis and oophoritis                                                                          |                                  | Non-incentivized    |
| Pelvic inflammatory disease          | N73         | Other female pelvic inflammatory diseases                                                           |                                  | Non-incentivized    |

| Disease group                                      | ICD10 code  | ICD 10 Name                                                                       | NHS Outcomes Framework 2014/2015 | Harrison et al 2013 |
|----------------------------------------------------|-------------|-----------------------------------------------------------------------------------|----------------------------------|---------------------|
| Pelvic inflammatory disease                        | N74         | Female pelvic inflammatory disorders in diseases classified elsewhere             |                                  | Non-incentivized    |
| Perforated/bleeding ulcer                          | K20         | Oesophagitis                                                                      | Acute                            |                     |
| Perforated/bleeding ulcer                          | K21         | Gastro-oesophageal reflux disease                                                 | Acute                            |                     |
| Perforated/bleeding ulcer                          | K25.0–K25.2 | Gastric ulcer                                                                     | Acute                            | Non-incentivized    |
| Perforated/bleeding ulcer                          | K25.4–K25.6 | Gastric ulcer                                                                     | Acute                            | Non-incentivized    |
| Perforated/bleeding ulcer                          | K26.0–K26.2 | Duodenal ulcer                                                                    | Acute                            | Non-incentivized    |
| Perforated/bleeding ulcer                          | K26.4–K26.6 | Duodenal ulcer                                                                    | Acute                            | Non-incentivized    |
| Perforated/bleeding ulcer                          | K27.0–K27.2 | Peptic ulcer, site unspecified                                                    | Acute                            | Non-incentivized    |
| Perforated/bleeding ulcer                          | K27.4–K27.6 | Peptic ulcer, site unspecified                                                    | Acute                            | Non-incentivized    |
| Perforated/bleeding ulcer                          | K28.0–28.2  | Gastrojejunal ulcer                                                               | Acute                            | Non-incentivized    |
| Perforated/bleeding ulcer                          | K28.4–K28.6 | Gastrojejunal ulcer                                                               | Acute                            | Non-incentivized    |
| Pyelonephritis and kidney/urinary tract infections | N10         | Acute tubulo-interstitial nephritis                                               | Acute                            | Non-incentivized    |
| Pyelonephritis and kidney/urinary tract infections | N11         | Chronic tubulo-interstitial nephritis                                             | Acute                            | Non-incentivized    |
| Pyelonephritis and kidney/urinary tract infections | N12         | Tubulo-interstitial nephritis, not specified as acute or chronic                  | Acute                            | Non-incentivized    |
| Pyelonephritis and kidney/urinary tract infections | N13.6       | Pyonephrosis                                                                      | Acute                            | Non-incentivized    |
| Pyelonephritis and kidney/urinary tract infections | N15.9       | Renal tubulo-interstitial disease, unspecified                                    | Acute                            |                     |
| Pyelonephritis and kidney/urinary tract infections | N30.0       | Acute cystitis                                                                    | Acute                            | Non-incentivized    |
| Pyelonephritis and kidney/urinary tract infections | N30.8       | Other cystitis                                                                    | Acute                            | Non-incentivized    |
| Pyelonephritis and kidney/urinary tract infections | N30.9       | Cystitis, unspecified                                                             | Acute                            | Non-incentivized    |
| Pyelonephritis and kidney/urinary tract infections | N39.0       | Urinary tract infection, site not specified                                       | Acute                            |                     |
| Stroke                                             | I61         | Intracerebral haemorrhage                                                         |                                  | Incentivized        |
| Stroke                                             | I62         | Other nontraumatic intracranial haemorrhage                                       |                                  | Incentivized        |
| Stroke                                             | I63         | Cerebral infarction                                                               |                                  | Incentivized        |
| Stroke                                             | I64         | Stroke, not specified as haemorrhage or infarction                                |                                  | Incentivized        |
| Stroke                                             | I66         | Occlusion and stenosis of cerebral arteries, not resulting in cerebral infarction |                                  | Incentivized        |
| Stroke                                             | I67.2       | Cerebral atherosclerosis                                                          |                                  | Incentivized        |
| Stroke                                             | I69.8       | Sequelae of other and unspecified cerebrovascular diseases                        |                                  | Incentivized        |
| Stroke                                             | R47.0       | Dysphasia and aphasia                                                             |                                  | Incentivized        |

Note. The set of codes defining All ACSCs is the union of sets of codes defining chronic and acute ACSC<sup>13</sup> and incentivised and non-incentivise ACSCs<sup>14</sup>. Incentivised ACSCs are those whose care was incentivised under the QOF in all years 2004 to 2017.

**Table A3: Number and annual growth rate of ACSC emergency admissions**

|                     | All ACSCs |               | Incentivised |               |
|---------------------|-----------|---------------|--------------|---------------|
|                     | N         | Growth rate   | N            | Growth rate   |
| <b>2004</b>         | 1955617   |               | 1111378      |               |
| <b>2005</b>         | 2004987   | 2.52%         | 1098023      | -1.20%        |
| <b>2006</b>         | 2034383   | 1.47%         | 1088389      | -0.88%        |
| <b>2007</b>         | 1947115   | -4.29%        | 1012077      | -7.01%        |
| <b>2008</b>         | 2119358   | 8.85%         | 1086936      | 7.40%         |
| <b>2009</b>         | 2193660   | 3.51%         | 1076740      | -0.94%        |
| <b>2010</b>         | 2303279   | 5.00%         | 1104581      | 2.59%         |
| <b>2011</b>         | 2329548   | 1.14%         | 1098469      | -0.55%        |
| <b>2012</b>         | 2460668   | 5.63%         | 1135639      | 3.38%         |
| <b>2013</b>         | 2490974   | 1.23%         | 1127694      | -0.70%        |
| <b>2014</b>         | 2427684   | -2.54%        | 1145161      | 1.55%         |
| <b>2015</b>         | 2523981   | 3.97%         | 1169832      | 2.15%         |
| <b>2016</b>         | 2498565   | -1.01%        | 1060092      | -9.38%        |
| <b>2017</b>         | 2508552   | 0.40%         | 1088585      | 2.69%         |
| <b>2004 to 2017</b> |           | <b>28.27%</b> |              | <b>-2.05%</b> |

*Note.* See Table A5 for a list of ICD10 codes for ACSCs. As with other studies<sup>2,3</sup> we found that 2007 (financial year 2007/8) was peculiar in that the number of ACSCs fell by 4.3%. This may be a result of changes in coding following the roll out of a prospective pricing regime for hospitals which linked payment to the number (and type) cases treated. There was an anomalously large fall in ACSCs classified as non-incentivised using the definitions in Harrison et al. (2014)<sup>15</sup> in 2014 (financial year 2014/15).

**Table A4 : Yearly average local correlation of ISARs**

|      | Global Index |
|------|--------------|
| 2004 | 0.527        |
| 2005 | 0.500        |
| 2006 | 0.527        |
| 2007 | 0.576        |
| 2008 | 0.606        |
| 2009 | 0.576        |
| 2010 | 0.596        |
| 2011 | 0.572        |
| 2012 | 0.570        |
| 2013 | 0.536        |
| 2014 | 0.596        |
| 2015 | 0.612        |
| 2016 | 0.627        |
| 2017 | 0.446        |

*Note.* ISARs: ACSC admissions indirectly standardised by age and gender. Moran's Global I is a measure of the average degree of correlation of a practice's ISAR with those of local practices. It was calculated using a 5 nearest neighbours row standardised weight matrix. The statistics are significant ( $p \leq 0.0001$ ) in every year. Results using other spatial weight matrices are similar.

**Table A5: Clustering of ISARs 2004 – 2017**

| Year | Spatial clusters | Practices | %      | Mean   | SD    | min    | max    |
|------|------------------|-----------|--------|--------|-------|--------|--------|
| 2004 | HH               | 722       | 8.82%  | 172.21 | 36.94 | 114.85 | 550.62 |
| 2004 | LL               | 309       | 3.77%  | 48.14  | 10.97 | 3.95   | 72.13  |
| 2004 | n.s.             | 7157      | 87.41% | 94.83  | 28.47 | 0      | 367.22 |
| 2005 | HH               | 746       | 9.21%  | 171.79 | 33.61 | 118.62 | 564.09 |
| 2005 | LL               | 378       | 4.66%  | 46.14  | 12.82 | 5.59   | 72.84  |
| 2005 | n.s.             | 6979      | 86.13% | 96.73  | 27.23 | 2.53   | 316.07 |
| 2006 | HH               | 768       | 9.52%  | 173.75 | 35.41 | 123.19 | 501.43 |
| 2006 | LL               | 381       | 4.72%  | 45.79  | 11.73 | 7.21   | 71.22  |
| 2006 | n.s.             | 6918      | 85.76% | 95.92  | 27.36 | 0      | 269.55 |
| 2007 | HH               | 750       | 9.37%  | 164.68 | 33.63 | 112.45 | 419.83 |
| 2007 | LL               | 586       | 7.32%  | 43     | 10.6  | 10.75  | 68.45  |
| 2007 | n.s.             | 6671      | 83.31% | 92.24  | 26.41 | 0      | 234.44 |
| 2008 | HH               | 783       | 9.82%  | 175.39 | 34.95 | 120.45 | 489.84 |
| 2008 | LL               | 581       | 7.29%  | 38.99  | 12.5  | 5.19   | 74.18  |
| 2008 | n.s.             | 6611      | 82.90% | 98.33  | 27.73 | 2.72   | 243.53 |
| 2009 | HH               | 756       | 9.53%  | 176.98 | 38.59 | 125.94 | 629.06 |
| 2009 | LL               | 583       | 7.35%  | 39.48  | 13.57 | 7.94   | 73.17  |
| 2009 | n.s.             | 6590      | 83.11% | 100.68 | 27.31 | 12.21  | 289.38 |
| 2010 | HH               | 807       | 10.15% | 183.19 | 38.89 | 132.05 | 721.78 |
| 2010 | LL               | 612       | 7.70%  | 44.25  | 14.03 | 8.26   | 75.74  |
| 2010 | n.s.             | 6531      | 82.15% | 103.67 | 28.22 | 13.44  | 294.17 |
| 2011 | HH               | 768       | 9.76%  | 178    | 36.47 | 124.5  | 557.78 |
| 2011 | LL               | 552       | 7.01%  | 46.91  | 13.33 | 8.59   | 76.13  |
| 2011 | n.s.             | 6552      | 83.23% | 102.93 | 27.77 | 19.46  | 292.91 |
| 2012 | HH               | 762       | 9.71%  | 185.05 | 37.95 | 131.27 | 610.57 |
| 2012 | LL               | 541       | 6.89%  | 48.68  | 13.42 | 9.99   | 79.63  |
| 2012 | n.s.             | 6545      | 83.40% | 107.25 | 28.75 | 25.17  | 325.24 |
| 2013 | HH               | 673       | 8.67%  | 184.94 | 37.82 | 131.76 | 625.98 |
| 2013 | LL               | 471       | 6.07%  | 47.6   | 14.47 | 12.49  | 79.89  |
| 2013 | n.s.             | 6615      | 85.26% | 106.93 | 30.62 | 25.23  | 962.19 |
| 2014 | HH               | 712       | 9.40%  | 176.11 | 31.14 | 122.31 | 360.88 |
| 2014 | LL               | 532       | 7.03%  | 38.68  | 13.8  | 8.28   | 75.21  |
| 2014 | n.s.             | 6328      | 83.57% | 101.74 | 29.8  | 12.17  | 881.62 |
| 2015 | HH               | 702       | 9.51%  | 178.88 | 30.08 | 117.09 | 341.99 |
| 2015 | LL               | 475       | 6.44%  | 32.8   | 16.02 | 0      | 71.57  |
| 2015 | n.s.             | 6201      | 84.05% | 103.08 | 29.92 | 14.38  | 887.25 |
| 2016 | HH               | 723       | 9.91%  | 173.47 | 31.74 | 123.46 | 450.75 |
| 2016 | LL               | 519       | 7.11%  | 33.03  | 14.94 | 4.18   | 66.13  |
| 2016 | n.s.             | 6057      | 82.98% | 99.25  | 28.53 | 12.21  | 675.46 |
| 2017 | HH               | 576       | 7.85%  | 179.73 | 40.21 | 118.18 | 558.96 |
| 2017 | LL               | 296       | 4.03%  | 31.24  | 13.81 | 1.68   | 60.88  |
| 2017 | n.s.             | 6468      | 88.12% | 97.09  | 34.2  | 0      | 954.53 |

ISARs: ACSC admissions indirectly standardised age and gender. Local clusters are identified using Moran's Local Index of Spatial Association. ns: LISA for practice is not statistically significant at 1%.



**Table A6: Transition probabilities (%) between spatial cluster between 2004 and 2017**

|                         |      | Type of cluster in 2017 |       |       | Total |
|-------------------------|------|-------------------------|-------|-------|-------|
|                         |      | LL                      | n.s.  | HH    |       |
| Type of cluster in 2004 | LL   | 69.28                   | 30.69 | 0.03  | 100   |
|                         | n.s. | 2.4                     | 94.34 | 3.26  | 100   |
|                         | HH   | 0.06                    | 29.92 | 70.02 | 100   |

*Note.* n.s. local clustering not significant.

## Supplementary Figures

**Figure A1 – Practice level ISAR ACSC emergency admission 2017 for stroke, for congestive heart failure, and for flu and pneumonia**

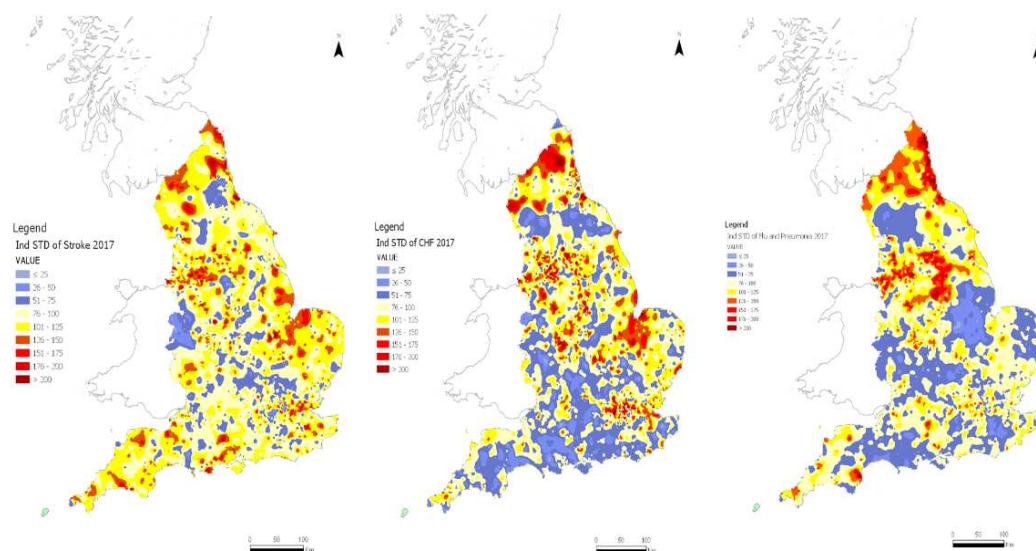

Note: ACSC rates are indirectly standardised by age and gender with expected rates for the reference population computed from 2017 data.

**Figure A2 – Change in ACSC ISARs 2004 to 2017**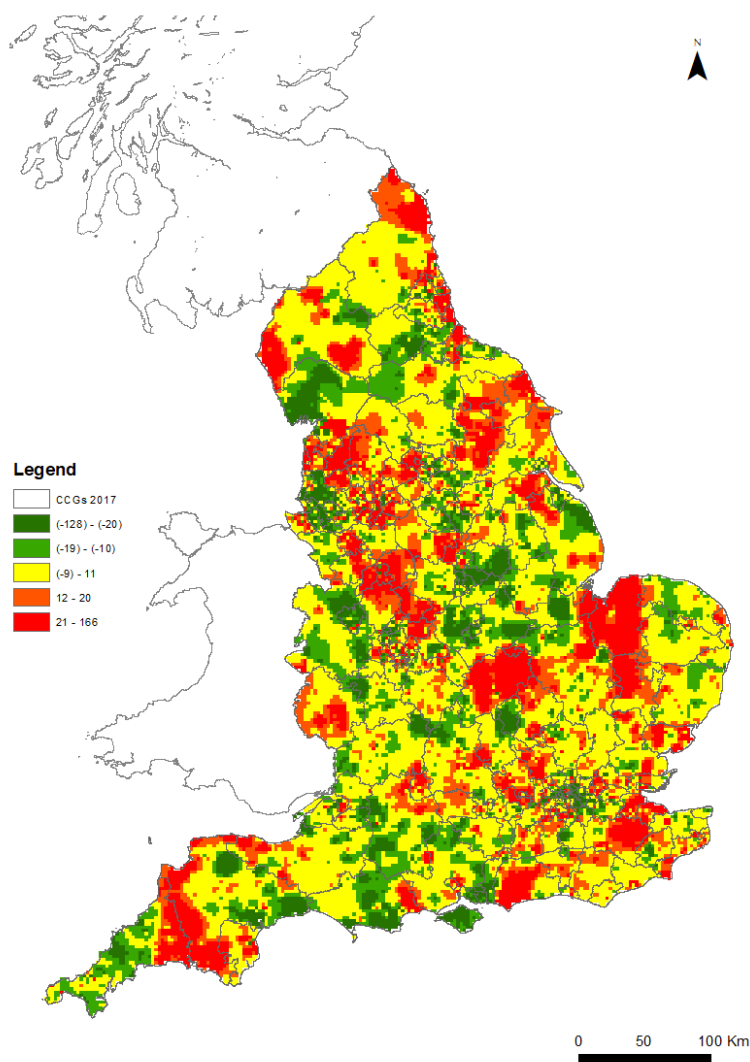

*Note.* ACSC emergency admissions are indirectly standardised by age and gender with expected rates for the reference population computed from data for all practices for all years 2004 to 2017.

Areas in red indicate increases in admission ratios over the observation period, while areas in green indicate decreases. Some areas with high ACSC ratios in 2004 improved over time, for example areas in and around Liverpool and Hull. Other areas with initial high admission rates did not experience a decrease, for example areas in and around Sunderland and Greater Manchester. Conversely, areas observed to have a relatively low ACSC rates in 2004, for example, Plymouth and York, observed a notable increase to 2017.
